1 **Model-based spatial-temporal mapping of opisthorchiasis in endemic**  
2 **countries of Southeast Asia**

3 Ting-Ting Zhao,<sup>1</sup> Yi-Jing Feng,<sup>1</sup> Pham Ngoc Doanh,<sup>2</sup> Somphou Sayasone,<sup>3</sup> Virak Khieu,<sup>4</sup> Choosak  
4 Nithikathkul,<sup>5</sup> Men-Bao Qian,<sup>6,7</sup> Yuan-Tao Hao<sup>1,8</sup> Ying-Si Lai,<sup>1,8\*</sup>

5 <sup>1</sup>Department of Medical Statistics, School of Public Health, Sun Yat-sen University, Guangzhou,  
6 Guangdong, People's Republic of China.

7 <sup>2</sup>Department of Parasitology, Institute of Ecology and Biological Resources, Graduate University of  
8 Science and Technology, Vietnam Academy of Sciences and Technology, Cau Giay, Hanoi, Vietnam.

9 <sup>3</sup>Lao Tropical and Public Health Institute, Ministry of Health, Vientiane Capital, Lao People's Democratic  
10 Republic.

11 <sup>4</sup>National Center for Parasitology, Entomology and Malaria Control, Ministry of Health, Phnom Penh,  
12 Cambodia.

13 <sup>5</sup>Tropical and Parasitic Diseases Research Unit, Faculty of Medicine, Mahasarakham University,  
14 Mahasarakham, Thailand.

15 <sup>6</sup>National Institute of Parasitic Diseases, Chinese Center for Disease Control and Prevention, Shanghai,  
16 People's Republic of China.

17 <sup>7</sup>WHO Collaborating Centre for Tropical Diseases, Key Laboratory of Parasite and Vector Biology,  
18 Ministry of Health, Shanghai, People's Republic of China.

19 <sup>8</sup>Sun Yat-sen Global Health Institute, Sun Yat-sen University, Guangzhou, Guangdong, People's Republic  
20 of China.

21 \*Correspondence to: Dr Ying-Si Lai, Department of Medical Statistics, School of Public Health, Sun Yat-  
22 sen University, Guangzhou, Guangdong 510080, China. laiys3@mail.sysu.edu.cn

**NOTE: This preprint reports new research that has not been certified by peer review and should not be used to guide clinical practice.**

## 23 **Abstract**

24 Opisthorchiasis is an overlooked danger to Southeast Asia. High-resolution disease risk maps are critical  
25 for targeting control interventions to priority areas; however, they haven't been available for Southeast  
26 Asia. A Bayesian spatial-temporal joint model was developed, where both point-referenced and area-  
27 level data were assumed to follow a binomial distribution, modeling with a logit regression in  
28 combination of potential influencing factors and spatial-temporal random effects. The model-based risk  
29 mapping identified area of high prevalence (>25%) of opisthorchiasis in northeastern Thailand, central-  
30 southern parts of Laos, and some eastern areas of Cambodia from 2010 onwards. And a total of 13.13  
31 million (95% BCI: 11.43-15.21) people were infected with *O. viverrini* in 2018 in four major endemic  
32 countries (ie, Thailand, Laos, Cambodia, and Vietnam) of Southeast Asia, with a prevalence of 6.96%  
33 (95% BCI: 6.06%-8.06%). These model-based high-resolution risk maps can provide important  
34 information to guide the spatial targeting of opisthorchiasis control interventions.

35

## 36 **Introduction**

37 End the epidemics of Neglected Tropical Diseases (NTDs) by 2030 embodied in the international set of  
38 targets for the Sustainable Development Goals (SDGs) endorsed by the United Nations empowers the  
39 efforts made by developing countries to combat the NTD epidemics (*UN,2015*). To date, 20 diseases  
40 have been listed as NTDs, and opisthorchiasis is under the umbrella of food-borne trematodiasis  
41 (*Ogorodova, et al.,2015*). Two species of opisthorchiasis are of public health significance, that is  
42 *Opisthorchis felineus* (*O. felineus*), endemic in eastern Europe and Russia, and *Opisthorchis viverrini* (*O.*  
43 *viverrini*) endemic in Southeast Asian countries (*Petney, et al.,2013*). The later species is of our interest  
44 in the current manuscript.

45 According to WHO's conservative estimation, an overall disease burden due to opisthorchiasis was  
46 188,346 disability-adjusting life years (DALYs) in 2010 (*Havelaar, et al.,2015*). Fürst and colleagues  
47 estimated that more than 99% of the burden worldwide attribute to *O. viverrini* infection in Southeast  
48 Asia (*Fürst, et al.,2012*). Five countries in Southeast Asia, Cambodia, Lao PDR, Myanmar, Thailand and  
49 Vietnam, are endemic for opisthorchiasis, with an estimated 67.3 million people at risk (*Keiser and*  
50 *Utzinger,2005*). It is well documented that chronic and repeated infection with *O. viverrini* leads to the

51 development of fatal bile duct cancer (cholangiocarcinoma) (*International Agency for Research on*  
52 *Cancer,1994*).

53 The life cycle of *O. viverrini* involves freshwater snails of the genus *Bithynia* as the first intermediate  
54 host, and freshwater cyprinoid fish as the second intermediate host. Humans and other carnivores (e.g.,  
55 cats and dogs), the final hosts, become infected by consuming raw or insufficiently cooked infected fish  
56 (*Andrews, et al.,2008; Saijuntha, et al.,2014*). Behavioral, environmental and socio-economic factors  
57 affect the transmission of *O. viverrini* (*Grundy-Warr, et al.,2012; Phimpraphai, et al.,2018;*  
58 *Phimpraphai, et al.,2017; Prueksapanich, et al.,2018*). Raw or insufficiently cooked fish consumption  
59 is the cultural root in endemic countries, shows a strong relationship with the occurrence of the disease  
60 (*Andrews, et al.,2008; Grundy-Warr, et al.,2012*). Poorly hygienic conditions increase the risk of  
61 infection, especially in areas practicing raw-fish-eating habit (*Grundy-Warr, et al.,2012*). In addition,  
62 environmental and climatic factors, such as temperature, precipitation and landscape, affecting either  
63 snail/fish population or growth of the parasites inside the intermediate hosts, can potentially influence  
64 the risk of human infection (*Forrer, et al.,2012; Suwannatrai, et al.,2017*). Important control strategies  
65 of *O. viverrini* infection include preventive chemotherapy, health education, environmental modification,  
66 improving sanitation, as well as comprehensive approaches with combinations of the above (*Saijuntha,*  
67 *et al.,2014*). For purposes of public health control, WHO recommends implementing preventive  
68 chemotherapy once a year or once every two years depending on the levels of prevalence in population,  
69 with complementary interventions such as health education and improvement of sanitation (*WHO,2009*).

70 Understanding the geographical distribution of *O. viverrini* infection risk at high spatial resolution is  
71 critical to prevent and control the disease cost-effectively in priority areas. Thailand conducted national  
72 surveys for *O. viverrini* prevalence in 1981, 1991, 2001, 2009, and 2014 (*Echaubard, et al.,2016;*  
73 *Suwannatrai, et al.,2018*), but the results of these surveys were presented at the province-level, which is  
74 less informative for precisely targeting control interventions. Suwannatrai and colleagues, based on  
75 climatic and *O. viverrini* presence data, produced climatic suitability maps for *O. viverrini* in Thailand  
76 using the MaxEnt modeling approach (*Suwannatrai, et al.,2017*). The maps brought insights for  
77 identifying areas with a high probability of *O. viverrini* occurrence; however, they did not provide direct  
78 information on prevalence of *O. viverrini* in population (*Elith, et al.,2011*). A risk map of *O. viverrini*  
79 infection in Champasack province of Lao PDR were presented by Forrer and colleagues (*Forrer, et*

80 *al.,2012*). To our knowledge, high-resolution, model-based risk estimates of *O. viverrini* infection are  
81 unavailable in the whole endemic region of Southeast Asia.

82 Bayesian geostatistical modeling is one of the most rigorous inferential approaches for high-resolution  
83 maps depicting the distribution of the disease risk (*Karagiannis-Voules, et al.,2015*). Geostatistical  
84 modeling relates geo-referenced disease data with potential influencing factors (e.g., socioeconomic and  
85 environmental factors) and estimates the infection risk in areas without observed data (*Gelfand and*  
86 *Banerjee,2017*). Common geostatistical models are usually based on point-referenced survey data  
87 (*Banerjee, et al.,2014*). In practice, disease data collected from various sources often consists of point-  
88 referenced and area-aggregated data. Bayesian geostatistical joint modeling approaches provide a  
89 flexible framework for combining analysis of both kinds of data (*Moraga, et al.,2017; Smith, et al.,2008*).  
90 In this study, we aimed (1) to collect all available survey data on the prevalence of *O. viverrini* infection  
91 at point- or area-level in Southeast Asia through systematic review; and (2) to estimate the spatial-  
92 temporal distribution of the disease risk at a high spatial resolution, with the application of advanced  
93 Bayesian geostatistical joint modeling approach.

94

## 95 **Results**

96 A total of 2,690 references were identified through systematically reviewing peer-review literatures, and  
97 13 additional references were gathered from other sources. According to the inclusion and exclusion  
98 criteria, 170 records were included, resulted in a total of 593 area-level surveys in 174 areas and 524  
99 point-level surveys at 396 locations in five endemic countries (ie, Cambodia, Lao PDR, Myanmar,  
100 Thailand and Vietnam) of Southeast Asia (Figure 1). Around 70% and 15% of surveys were conducted  
101 in Thailand and Lao PDR, respectively. Only two relevant records were obtained from Myanmar. To  
102 avoid large estimated errors, we did not include this data in the final geostatistical analysis. All surveys  
103 were conducted after 1970, with more than two third done after 2000. Most surveys (95%) are  
104 community-based. Around 40% of surveys used the Kato-Katz technique for diagnosis, while another  
105 41% did not specify diagnostic approaches. Mean prevalence calculated directly from survey data was  
106 16.82% across the study region. A summary of survey data is listed in Table 1, and survey locations and  
107 observed prevalence in each period are shown in Figure 2. Area-level data cover all regions in Thailand

108 and Lao PDR, and most regions in Cambodia and Vietnam, whilst point-referenced data are absent in  
 109 most areas of Vietnam, the western part of Cambodia and southern part of Thailand.

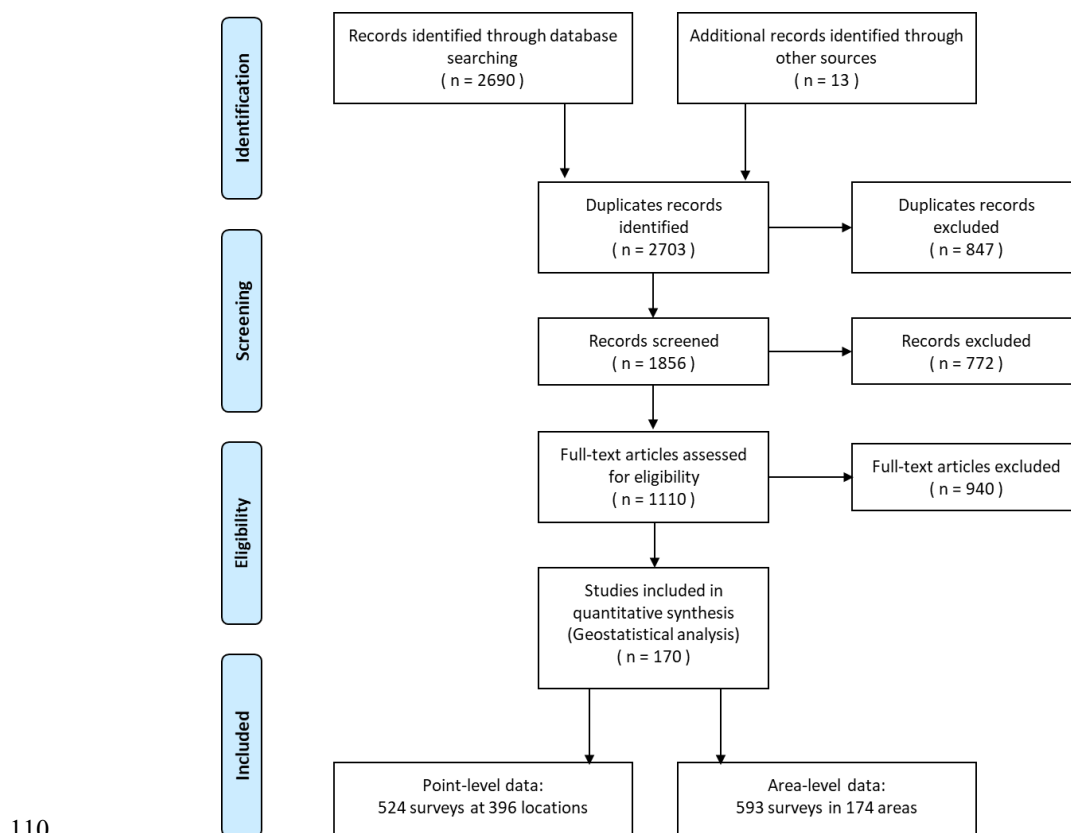

110

111 **Figure 1. Data search and selection flow chart.**

112 **Table 1. Overview of opisthorchiasis survey data in Southeast Asia**

|                                        | <b>Cambodia</b> | <b>Lao PDR</b> | <b>Myanmar</b> | <b>Thailand</b> | <b>Vietnam</b> | <b>Total</b> |
|----------------------------------------|-----------------|----------------|----------------|-----------------|----------------|--------------|
| Relevant papers                        | 14              | 44             | 2              | 98              | 15             | 170          |
| Total surveys/locations                | 91/73           | 166/99         | 6/6            | 783/338         | 71/64          | 1117/580     |
| Survey type (surveys/locations)        |                 |                |                |                 |                |              |
| School                                 | 33/31           | 4/4            | 0/0            | 14/14           | 0/0            | 51/49        |
| Community                              | 58/46           | 162/97         | 6/6            | 769/328         | 71/64          | 1066/541     |
| Location type (surveys/locations)      |                 |                |                |                 |                |              |
| Point-level                            | 69/54           | 102/81         | 3/3            | 343/251         | 7/7            | 524/396      |
| Area-level                             | 22/19           | 64/18          | 3/3            | 440/77          | 64/57          | 593/174      |
| Period                                 | 1998-2016       | 1989-2016      | 2015-2016      | 1978-2018       | 1991-2015      | 1978-2018    |
| Year of Survey (surveys/locations)     |                 |                |                |                 |                |              |
| <=1989                                 | 0/0             | 2/2            | 0/0            | 138/118         | 0/0            | 140/120      |
| 1990-1999                              | 1/1             | 11/6           | 0/0            | 126/103         | 7/3            | 145/113      |
| 2000-2009                              | 67/57           | 76/56          | 0/0            | 202/117         | 8/8            | 353/238      |
| >=2010                                 | 23/18           | 77/55          | 6/6            | 317/243         | 56/55          | 479/377      |
| Diagnostic methods (surveys/locations) |                 |                |                |                 |                |              |

|                     | Cambodia | Lao PDR | Myanmar | Thailand | Vietnam | Total   |
|---------------------|----------|---------|---------|----------|---------|---------|
| Kato-Katz           | 86/70    | 128/83  | 3/3     | 215/167  | 7/7     | 439/330 |
| FECT                | 2/2      | 17/13   | 3/3     | 112/102  | 0/0     | 134/120 |
| Stoll's             | 0/0      | 0/0     | 0/0     | 38/28    | 0/0     | 38/28   |
| PCR                 | 0/0      | 5/4     | 0/0     | 1/1      | 0/0     | 6/5     |
| Combined            | 3/3      | 14/13   | 0/0     | 21/17    | 0/0     | 38/33   |
| Others              | 0/0      | 1/1     | 0/0     | 6/6      | 0/0     | 7/7     |
| NS*                 | 0/0      | 6/6     | 0/0     | 391/111  | 64/57   | 461/174 |
| Mean prevalence (%) | 10.56%   | 38.63%  | 4.93%   | 14.30%   | 2.65%   | 16.82%  |

113 \*NS: not stated or missing

114

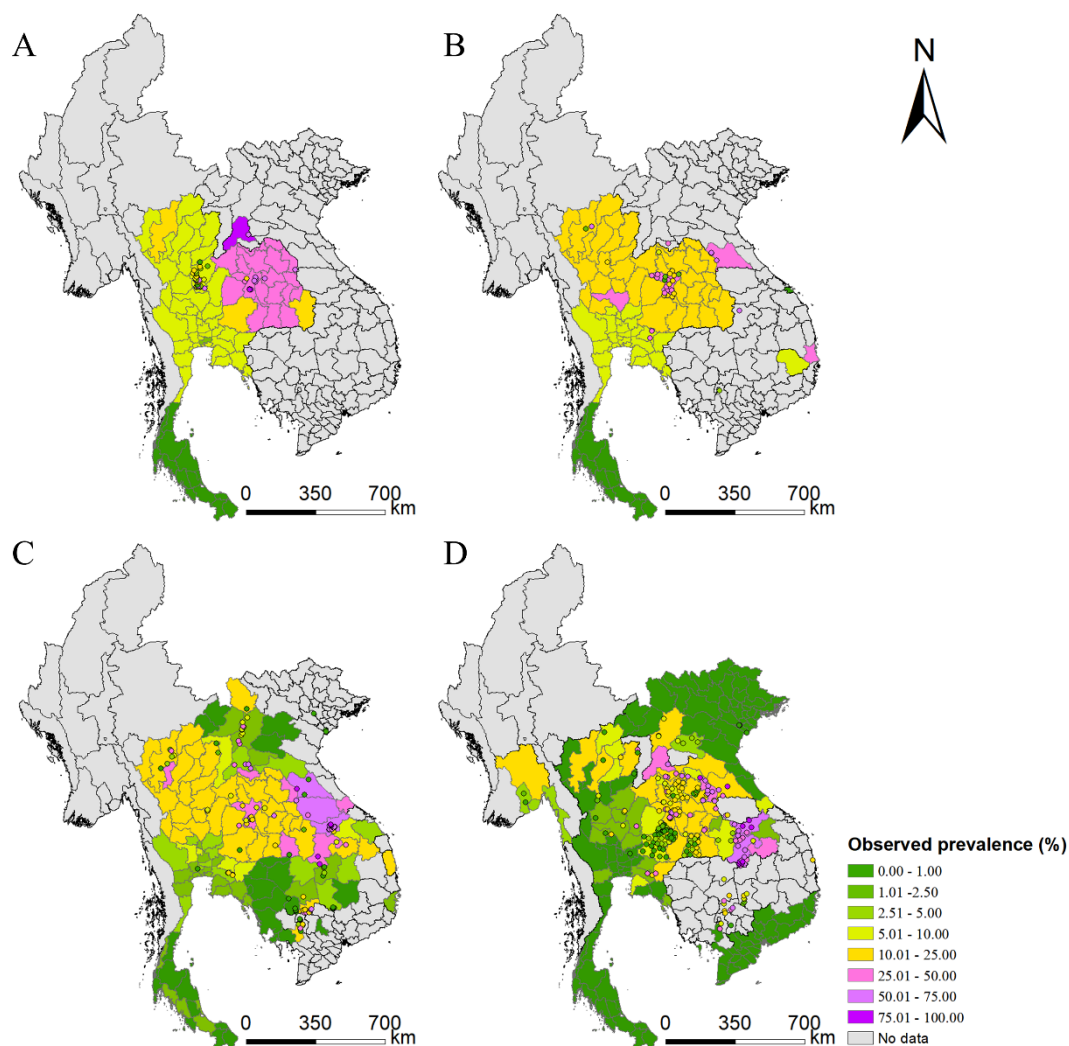

115

116 **Figure 2. Survey locations and observed prevalence of *O. viverrini* infection in endemic countries**

117 **of Southeast Asia. (A) Before 1990, (B) 1990-1999, (C) 2000-2009, and (D) from 2010 onwards.**

118 Five variables were selected for the final model through the Bayesian variable selection process (Table 2).

119 The infection risk was significantly high in the community population in comparison to that of school-

120 aged children. Positive associations were identified between the prevalence of *O. viverrini* and human  
 121 influence index as well as travel time to the nearest big city. Annual precipitation was negatively  
 122 correlated to the infection risk. People living in areas with distance to the nearest open water bodies  
 123 longer than 1.5 km showed a negative risk with a posterior probability of 97.2%, compared to that with  
 124 distance smaller than 0.5 km. The AUC was 0.79, indicating the Bayesian joint model had a reasonable  
 125 capacity of prediction accuracy. The model performance was much better than that of the model only  
 126 based on point-referenced data (appendix p 10).

127 **Table 2. Posterior summaries of model parameters**

|                                                | Estimated median (95% BCI) | Prob (%) <sup>†</sup> |
|------------------------------------------------|----------------------------|-----------------------|
| Survey type                                    |                            |                       |
| School-based survey                            | Ref                        | -                     |
| Community-based survey                         | 0.34 (0.16, 0.51)*         | > 99.99%              |
| Annual precipitation                           | -0.14 (-0.25, -0.03)*      | 0.20                  |
| Human influence index                          | 0.18 (0.11, 0.25)*         | > 99.99%              |
| Distance to the nearest open water bodies (km) |                            |                       |
| < 0.50                                         | Ref                        | -                     |
| 0.50 - 1.50                                    | -0.06 (-0.19, 0.07)        | 17.60%                |
| > 1.50                                         | -0.17 (-0.34, 0.00)        | 2.80%                 |
| Travel time to the nearest big city (min)      |                            |                       |
| < 35.68                                        | Ref                        | -                     |
| 35.68 - 86.67                                  | 0.69 (0.48, 0.91)*         | > 99.99%              |
| > 86.67                                        | 0.75 (0.51, 1.00)*         | > 99.99%              |
| Spatial range (km)                             | 61.75 (53.63, 71.08)       | -                     |
| Temporal correlation coefficient $\rho$        | 0.85 (0.79, 0.89)          | -                     |
| Spatial variance $\sigma_{\phi}^2$             | 22.22 (18.36, 26.70)       | -                     |

128 <sup>†</sup>posterior probability of the coefficient larger than zero;

129 \*Significant based on 95% Bayesian credible interval (BCI).

130 The estimated risk maps of *O. viverrini* infection for the four periods (ie, before 1990, 1990-1999, 2000-  
 131 2009, and from 2010 onwards) are presented in Figure 3. From 2010 onwards, the high infection risk  
 132 (with prevalence >25%) was mainly estimated in regions of the southern, the central and the north-central  
 133 parts of Lao PDR, some areas in the east-central and the southern parts of Cambodia, and some areas of  
 134 the northeastern and the northern parts Thailand. The southern part of Thailand, the northern part of Lao  
 135 PDR, and the western part of Cambodia showed low risk estimates (with prevalence <5%) of *O. viverrini*  
 136 infection. The central and several southern parts of Vietnam showed low to moderate risk of *O. viverrini*  
 137 infection, while there was no evidence of *O. viverrini* in other parts of Vietnam. High estimation

138 uncertainty was mainly present in the central part of Lao PDR, the northern and the eastern parts of  
139 Thailand, and the central part of Vietnam (Figure 4).

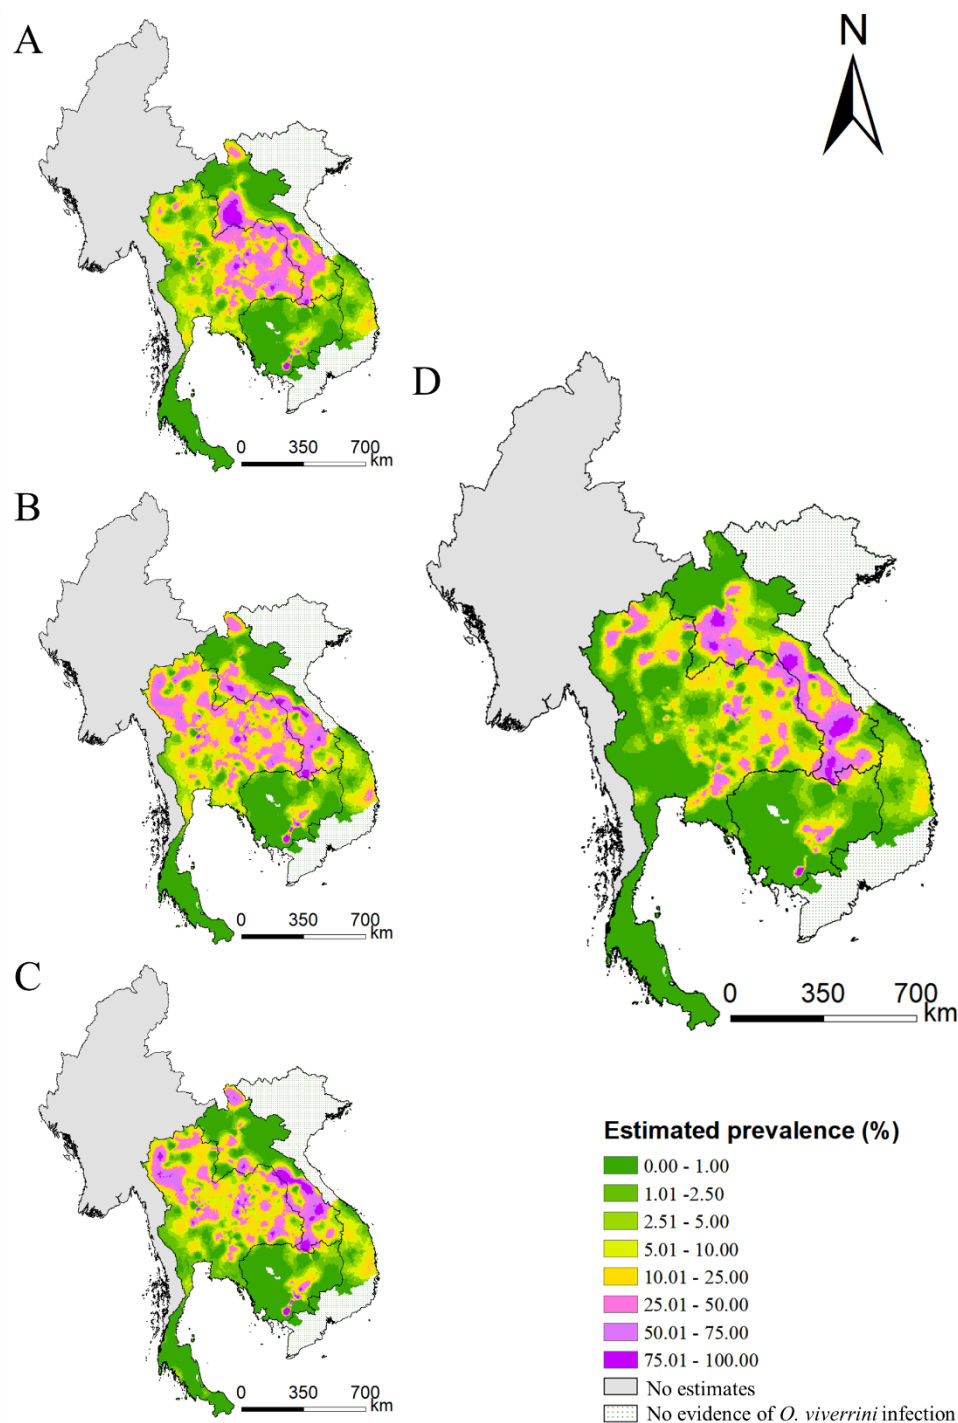

140

141 **Figure 3. Model-based estimated risk maps of *O. viverrini* infection in endemic countries of**  
142 **Southeast Asia.** Estimated prevalence based on the median of the posterior estimated distribution of  
143 infection risk for periods (A) before 1990, (B) 1990-1999, (C) 2000-2009, and (D) from 2010 onwards.



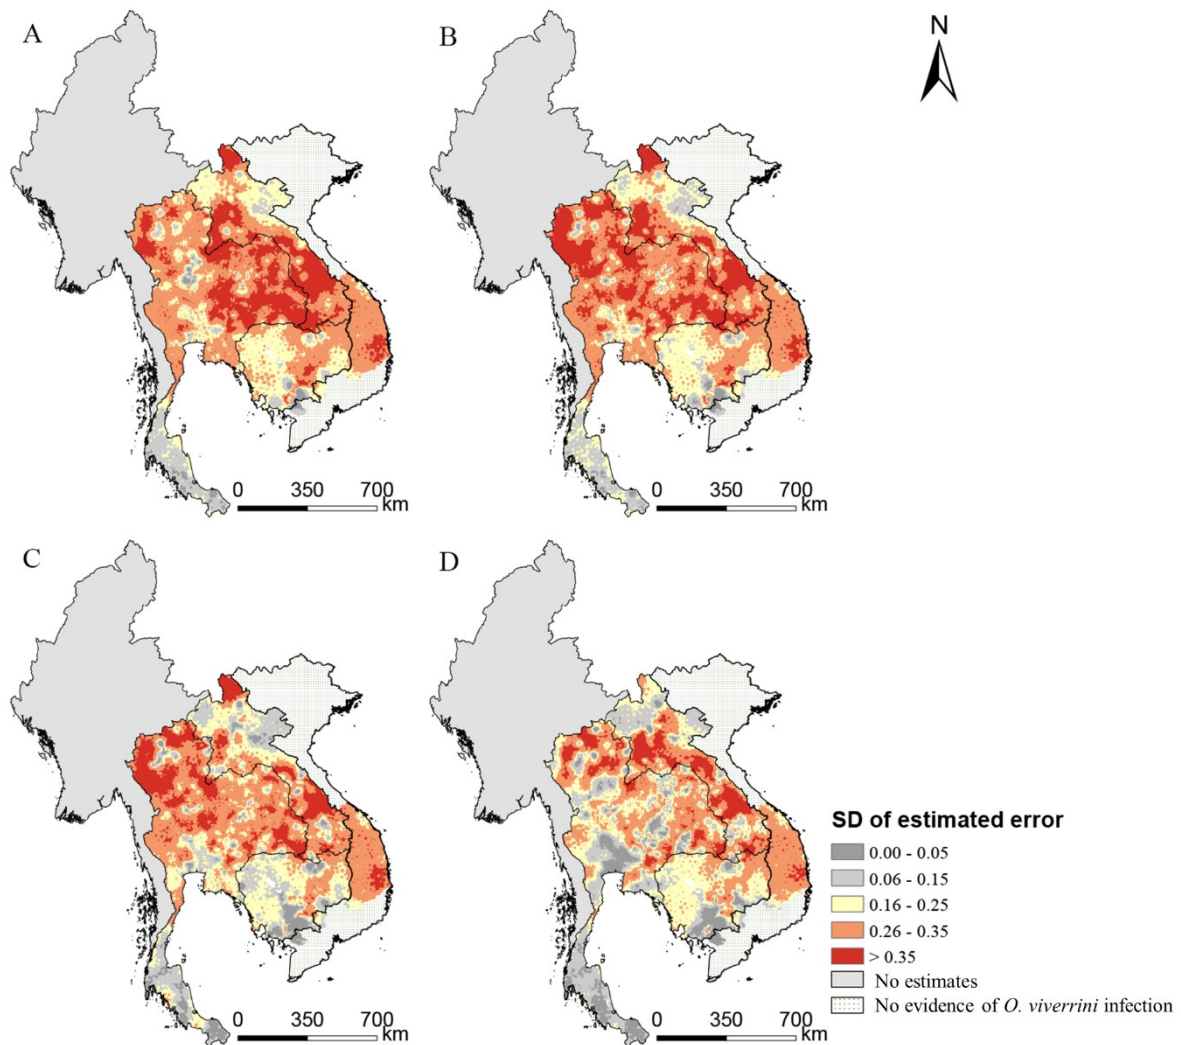

144

145 **Figure 4. The estimation uncertainty in endemic countries of Southeast Asia. (A) Before 1990, (B)**  
146 **1990-1999, (C) 2000-2009, and (D) from 2010 onwards.**

147 In addition, the infection risk varies over time (Figure 5). Most areas of northern Thailand showed an  
148 obvious increasing trend from the period before 1990 to 1990-1999, while many areas of the country  
149 presented a considerable decrease of infection risk after 2000. The infection risk kept increasing in most  
150 areas of the central and the southern parts of Lao PDR, while the north-central part firstly decreased and  
151 then increased. The east-central part of Cambodia showed an increasing trend between 2000-2009 and  
152 2010 onwards, while the infection risk changed slightly in central parts of Vietnam.

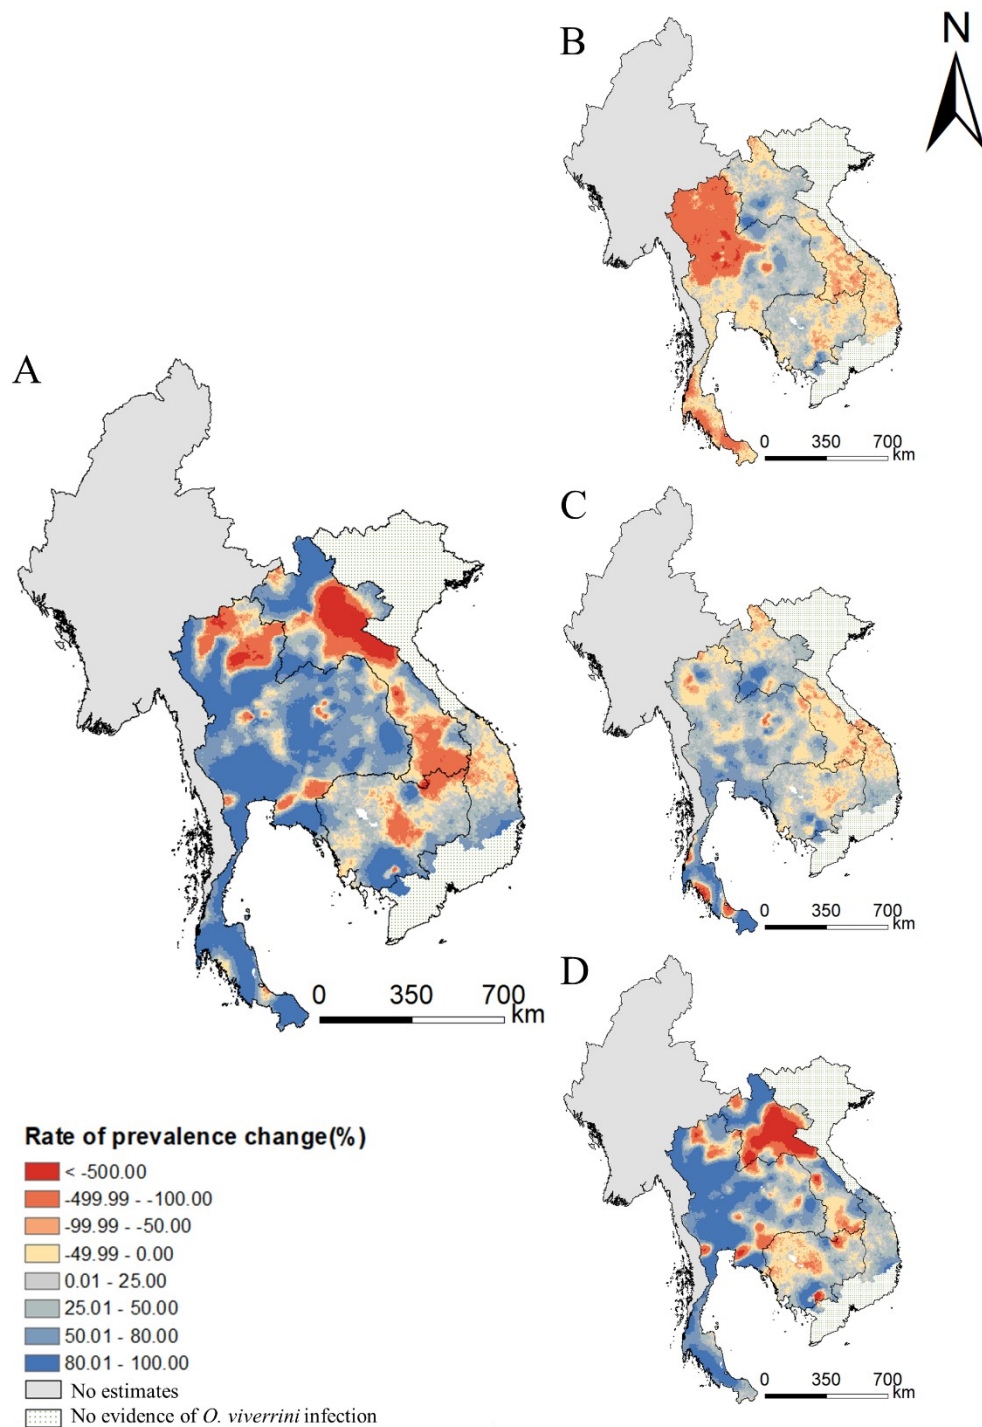

153

154 **Figure 5. Changes of *O. viverrini* infection risk across time periods.** Changes were calculated by the  
155 median of the posterior estimated distribution of infection risk for the former time period minus that for  
156 the latter time period divided by that for the former time period. The risk changes (A) between the period  
157 before 1989 and from 2010 onwards; (B) between the period before 1989 and 1990-1999; (C) between  
158 the period 1990-1999 and 2000-2009; and (D) between the period 2000-2009 and from 2010 onwards.

159 The population-adjusted estimated prevalence over the study region presents a trend down after 2000  
 160 (Figure 6 and appendix pp 13-17). At the country-level, the estimated prevalence in Thailand showed a  
 161 fast decline from 2000 onwards, and took on a gradually decreasing change in Cambodia, while it  
 162 maintained quite stable in Lao PDR and Vietnam during the whole study period. Particularly, we  
 163 estimated that in 2018, the overall population-adjusted estimated prevalence of *O. viverrini* infection in  
 164 the whole study region was 6.96% (95% BCI: 6.06%-8.06%), corresponding to 13.13 million (95% BCI:  
 165 11.43-15.21) infected individuals (Table 3). Lao PDR showed the highest prevalence (32.47%, 95% BCI:  
 166 28.75%-37.08%), followed by Thailand (10.63%, 95% BCI: 9.48%-11.76%), Cambodia (8.57%, 95%  
 167 BCI: 5.83%-12.85%), and Vietnam (2.14%, 95% BCI: 0.89%-3.95%). Thailand had the largest numbers  
 168 of individuals estimated to be infected with *O. viverrini* (7.34 million, 95% BCI: 6.55-8.13), followed by  
 169 Lao PDR (2.26 million, 95% BCI: 2.00-2.58), Vietnam (2.06 million, 95% BCI: 0.86-3.81), and  
 170 Cambodia (1.39 million, 95% BCI: 0.95-2.08).

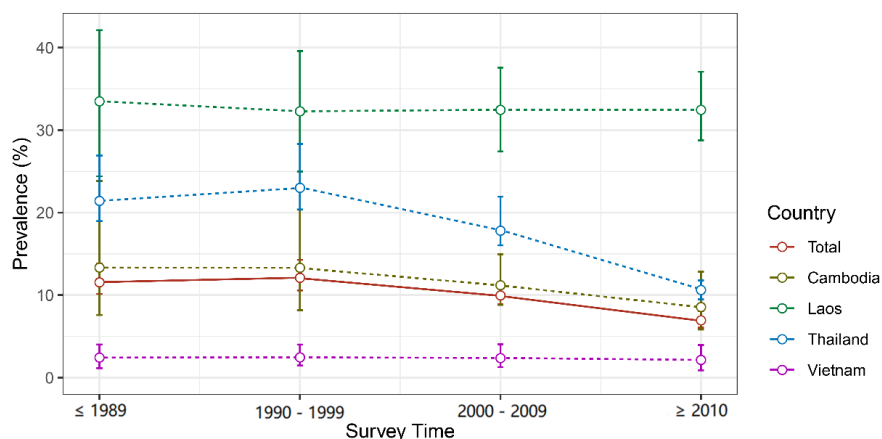

171

172 **Figure 6. Trends in estimated prevalence of *O. viverrini* infection in Southeast Asia.**

173 **Table 3. Population-adjusted estimated prevalence and number of individuals infected with**  
 174 ***O. viverrini* in endemic countries of Southeast Asia\***

|          | Population ( $\times 10^3$ ) | Prevalence (%)          | No. infected ( $\times 10^3$ ) |
|----------|------------------------------|-------------------------|--------------------------------|
| Cambodia | 16227.39                     | 8.57% (5.83%, 12.85%)   | 1390.39 (945.79, 2084.47)      |
| Lao PDR  | 6960.28                      | 32.47% (28.75%, 37.08%) | 2259.77 (2000.91, 2580.64)     |
| Thailand | 69112.64                     | 10.63% (9.48%, 11.76%)  | 7343.56 (6551.40, 8129.65)     |
| Vietnam  | 96421.69                     | 2.14% (0.89%, 3.95%)    | 2061.88 (859.84, 3810.27)      |
| Total    | 188722.01                    | 6.96% (6.06%, 8.06%)    | 13134.84 (11433.70, 15209.68)  |

175 \*Estimates were based on gridded population of 2018 and the median and 95% BIC of the posterior  
 176 estimated distribution of the infection risk from 2010 onwards.

177

## 178 **Discussion**

179 In this study, we produced model-based, high-resolution risk estimates of opisthorchiasis across endemic  
180 countries of Southeast Asia through systematic reviewing and the advanced Bayesian geostatistical joint  
181 modeling approach. The disease is the most important foodborne trematodiasis in the study region (*Sripa,*  
182 *et al.,2010*), taking into account most of the disease burden of opisthorchiasis in the world (*Fürst, et*  
183 *al.,2012*). The estimates were obtained by systematically reviewing all possible geo-referenced survey  
184 data and applying a Bayesian geostatistical modeling approach that jointly analyzes point-referenced and  
185 area-aggregated disease data, as well as environmental and socioeconomic predictors. Our findings will  
186 be important for guiding control and intervention cost-effectively and serve as a baseline for future  
187 progress assessment.

188 Our estimates suggested that there was an overall decrease of *O. viverrini* infection in Southeast Asia,  
189 which may be largely attributed to the decline of infection prevalence in Thailand. This decline was  
190 probably on account of the national opisthorchiasis control program launched by the Ministry of Public  
191 Health of Thailand from 1987 (*Jongsuksuntigul and Imsomboon,2003; Jongsuksuntigul, et al.,2003*).  
192 Our high-resolution risk estimates in Thailand from 2010 onwards showed similar pattern as the climatic  
193 suitability map provided by Suwannatral and colleagues (*Suwannatrai, et al.,2017*). In this case, we  
194 estimated the prevalence of the population instead of the occurrence probability of the parasite, which  
195 arms decision makers with more direct epidemiological information for guiding control and intervention.  
196 The national surveys in Thailand reported a prevalence of 8.7% and 5.2% in 2009 and 2014, respectively  
197 (*MOPH,2014; Wongsaroj, et al.,2014*). However, we estimated higher prevalence of 17.81% (95% BCI:  
198 16.04%-21.94%) and 10.63% (95% BCI: 9.48%-11.76%) in the periods 2000-2009 and from 2010  
199 onwards, respectively. Even though the national surveys covered most provinces in Thailand, estimates  
200 were based on simply calculating the percentage of positive cases among all the participants (*Wongsaroj,*  
201 *et al.,2014*), and the remote areas might not be included (*Maipanich, et al.,2004*). Instead, our estimates  
202 were based on rigorous Bayesian geostatistical modeling of available survey data with environmental  
203 and socioeconomic predictors, accounting for heterogeneous distribution of infection risk and population  
204 density when aggregating country-level prevalence.

205 Our findings suggested that the overall infection risk of *O. viverrini* did not decline in Lao PDR during  
206 the study periods, consistent with conclusions drawn by Suwannatrai and colleagues (*Suwannatrai, et*  
207 *al.,2018*). We estimated that a total number of 2.26 (95% BCI: 2.00-2.58) million people living in Lao  
208 PDR was infected with *O. viverrini*, equivalent to that estimated by WHO in 2004 (*WHO,2002*). Besides,  
209 our risk mapping for Champasack province shares similarly risk map pattern produced by Forrer and  
210 colleagues (*Forrer, et al.,2012*). A national-scaled survey in Cambodia during the period 2006-2011  
211 reported infection rate of 5.7% (*Yong, et al.,2014*), lower than our estimation of 8.57% (95% BCI:  
212 5.83%-12.85%) from 2010 onwards. The former may underestimate the prevalence because more than  
213 77% of participants were schoolchildren (*Yong, et al.,2014*). Another large survey in five provinces of  
214 Cambodia suggested a large intra-district variation, which makes the identification of endemic areas  
215 difficult (*Miyamoto, et al.,2014*). Our high-resolution estimates for Cambodia help to differentiate the  
216 intra-district risk. However, the estimates should be taken cautious due to large district-wide variances  
217 and a relatively small number of surveys. Indeed, *O. viverrini* infection was underreported in Cambodia  
218 (*Khieu, et al.,2019*), and further point-referenced survey data are recommended for more confirmative  
219 results.

220 Although an overall low prevalence was estimated in Vietnam (2.13%, 95% BCI: 0.89%-3.95%) from  
221 2010 onwards, it corresponds to 2.06 million (95% BCI: 0.86%-3.81%) people infected, comparable to  
222 the number in Lao PDR, mainly due to a larger population in Vietnam. The risk mapping suggested  
223 moderate to high risk areas presented in central Vietnam, with the highest risk in Phu Yen province,  
224 particularly. This agreed with previous studies considering the province a “hotspot” (*Doanh and*  
225 *Nawa,2016*). Of note, even though there was no evidence of *O. viverrini* infection in the northern part of  
226 the country, *Clonorchis sinensis*, another important liver fluke species, is endemic in the region  
227 (*Sithithaworn, et al.,2012*). We didn't provide estimates for Myanmar in case of large estimated errors.  
228 Indeed, only two relevant papers were identified by our systematic review, where one shows low to  
229 moderate prevalence in three regions of Lower Myanmar (*Aung, et al.,2017*), and the other found low  
230 endemicity of *O. viverrini* infection in three districts of the capital city Yangon (*Sohn, et al.,2019*).  
231 Nation-wide epidemiological studies are urgent for a more comprehensive understanding of the disease  
232 in Myanmar.

233 We identified several important factors associated with *O. viverrini* infection in Southeast Asia, which  
234 may provide insights for the prevention and control of the disease. The infection risk was higher in the  
235 entire community than that in schoolchildren, consistent with multiple studies (*Aung, et al.,2017; Forrer,*  
236 *et al.,2012; Miyamoto, et al.,2014; Van De,2004; Wongsaroj, et al.,2014*). HII, a measure of human  
237 direct influence on ecosystems (*Sanderson, et al.,2002*), showed a positive relationship with *O. viverrini*  
238 infection risk. A similar association has been found on HII and *A. lumbricoides* infection in South Asia  
239 (*Lai, et al.,2019*). People living in areas with a longer distance to the nearest open water bodies tended  
240 to have lower risk, consistent with the previous finding (*Forrer, et al.,2012*). We found annual  
241 precipitation negatively associated with *O. viverrini* infection, consistent with the previous study  
242 conducted in Southern Lao PDR (*Forrer, et al.,2012*). Higher precipitation might decrease the disease  
243 transmission by creating fast-flowing water unsuitable for intermediate host snail survival (*McCreesh*  
244 *and Booth,2013*). A negative association was found between *O. viverrini* infection and travel time to the  
245 nearest big city, suggesting the disease was more likely to occur in rural areas. The habit of eating raw or  
246 insufficiently cooked fish was more common in rural areas than that in big cities, which could partially  
247 explain our findings (*Grundy-Warr, et al.,2012; Keiser and Jennifer,2019*). Indeed, this culturally  
248 rooted habit is one of the determinants for human opisthorchiasis (*Kaewpitoon, et al.,2008; Ziegler, et*  
249 *al.,2011*). However, the precise geographical distribution of such information is unavailable and thus we  
250 could not use it as a covariate in this study.

251 Our estimate of the number of people infected with *O. viverrini* is higher than that of the previous study  
252 (13.1 million vs 8.6 million (*Qian and Zhou,2019*)) emphasizing the public health importance of this  
253 neglected disease in Southeast Asia, and suggesting that more effective control interventions should be  
254 conducted, particularly in the high risk areas. The successful experience in the intervention of Thailand  
255 may be useful for reference by other endemic countries of the region. The national opisthorchiasis control  
256 program, supported by the government of Thailand, applied interrelated approaches, including stool  
257 examination and treatment of positive cases, health education aiming at the promotion of cooked fish  
258 consumption, and environmental sanitation to improve hygienic defecation (*Jongsuksuntigul and*  
259 *Imsomboon,2003*). In addition, for areas with difficulties to reduce infection risk , a new strategy was  
260 developed by Sripa and colleagues, using the EcoHealth approach with anthelmintic treatment, novel  
261 intensive health education on both communities and schools, ecosystem monitoring, and active

262 participation of the community (*Sripa, et al.,2015*). This “Lawa model” shows good effectiveness in  
263 Lawa Lake area, where the liver fluke was highly endemic (*Sripa, et al.,2015*). Furthermore, common  
264 integrated control interventions (eg, combination of preventive chemotherapy with praziquantel,  
265 improvement of sanitation and water sources, and health education) are applicable not only for  
266 opisthorchiasis but also for other NTDs, such as soil-transmitted helminth infection and schistosomiasis,  
267 which are also prevalent in the study region (*Dunn, et al.,2016; Gordon, et al.,2019*). Implementation of  
268 such interventions in co-endemic areas could be cost-effective (*Baker, et al.,2011; WHO,2012*).

269 Frankly, several limitations exist in our study. We collected data from different sources, locations of  
270 which might not be random and preferential sampling might exist. Nevertheless, we performed a risk-  
271 preferential sampling test and no significant preferential sampling was found, indicating the data good  
272 representative across the study region (appendix p 11). We assumed similar proportions of age and gender  
273 in different surveys, as most of which only reported prevalence aggregated by age and gender.  
274 Nevertheless, considering the possible differences in infection risk between the whole population and  
275 schoolchildren, we categorized survey types to the community- and school-based. We set clear criteria  
276 for selection of all possible qualified surveys and didn’t exclude surveys that only reported prevalence  
277 without numbers of examination or those reported prevalence in intervals without exact observed values.  
278 Data imputation was undertaken and sensitivity analysis showed that the setting of the imputation had  
279 little effects on the final results (appendix pp 18-22). Our analysis was based on survey data under  
280 different diagnostic methods. The sensitivity and specificity of the same diagnostic method may differ  
281 across studies (*Charoensuk, et al.,2019; Laoprom, et al.,2016; Sayasone, et al.,2015*), while different  
282 diagnostic methods may result in different results in the same survey. Due to the lack of enough  
283 information on the assessment of the quality and procedure of the diagnostic approach in each survey,  
284 we assumed similar diagnostic sensitivity and specificity across surveys (*Lu, et al.,2017*). In addition,  
285 most of the diagnostic methods in the surveys were based on fecal microscopic technique on eggs, which  
286 could not effectively distinguish between *O. viverrini* and minute intestinal flukes of the family  
287 Heterophyidae (eg heterophyid and lecithodendriid) (*Charoensuk, et al.,2019; Sato, et al.,2010*). Thus,  
288 our results may overestimate the *O. viverrini* infection risk in areas where heterophyid and  
289 lecithodendriid are endemic, such as Phongsaly, Saravane and Champasak provinces in Lao PDR (*Chai,*  
290 *et al.,2013; Chai, et al.,2010; Sato, et al.,2010*), Nan and Lampang provinces in Thailand (*Wijit, et*

291 *al.*,2013), and Takeo province in Cambodia (*Sohn,2011*). There is an urgent need for the application of  
292 more powerful diagnostic practices with higher sensitivity and specificity to better detect the true  
293 *O. viverrini* prevalence, such as PCR (*Lovis, et al.,2009; Lu, et al.,2017; Sato, et al.,2010*). Nevertheless,  
294 because of the similar treatment and the prevention strategies of *O. viverrini* and minute intestinal flukes  
295 (*Keiser and Utzinger,2010*), our risk mapping is valuable also for areas co-endemic with the above flukes.  
296 In conclusion, this study contributes to better understand the spatial-temporal characteristics of  
297 *O. viverrini* infection in major endemic countries of Southeast Asia, providing valuable information  
298 guiding control and intervention, and serving as a baseline for future progress assessment. Estimates were  
299 based on a rigorous geostatistical framework jointly analyzing point- and areal level survey data with  
300 potential predictors. The higher number of infected people we estimated highlights the public health  
301 importance of this neglected disease in the study region. More comprehensive epidemiological studies  
302 are urgently needed for endemic areas with scant survey data.

303

## 304 **Materials and Methods**

### 305 **Search strategy, selection criteria and data extraction**

306 We did a systematic review (registered in the International Prospective Register of Systematic Reviews,  
307 PROSPERO, No.CRD42019136281) following the PRISMA guidelines (appendix pp 43-44) to collect  
308 relevant publications reporting prevalence data of opisthorchiasis in Southeast Asia (*Moher, et al.,2010*).  
309 We searched PubMed and ISI Web of Science from inception to February 9, 2020, with search terms:  
310 (liver fluke\* OR Opisthorchi\*) AND (Southeast Asia OR Indonesia OR (Myanmar OR Burma) OR  
311 Thailand OR Vietnam OR Malaysia OR Philippines OR Lao PDR OR Cambodia OR Timor OR Brunei  
312 OR Singapore). We set no limitations on language, date of survey, or study design in our search strategy.  
313 We followed a protocol for inclusion, exclusion and extraction of survey data (appendix pp 4-5). Firstly,  
314 we screened titles and abstracts to identify potentially relevant articles. Publications on in vitro studies,  
315 or absence of human studies or absence of disease studies were excluded. Quality control was undertaken  
316 by re-checking 20% of randomly selected irrelevant papers. Second, the full-text review was applied to  
317 potentially relevant articles. We excluded publications with following conditions: absence of prevalence  
318 data; studies done in specific patient groups (eg, prevalence on patients with specific diseases), in specific



319 population groups (eg, travelers, military personnel, expatriates, nomads, displaced or migrating  
320 population), under specific study designs (eg, case report studies, case-control studies, clinical trials,  
321 autopsy studies); drug efficacy or intervention studies (except for baseline data or control groups),  
322 population deworming within one year, the survey time interval more than ten years, data only based on  
323 the direct smear method (due to low sensitivity) or serum diagnostics (due to unable to differ the past and  
324 the active infection). During the full-text review, the potential relevant cited references of the articles  
325 were also screened. Studies were included if they reported survey data at provincial level and below, such  
326 as administrative divisions of level one to three (ADM1: province, state, etc.; ADM2: city, etc.; ADM3:  
327 county, etc.), and at point-level (village, town, school, etc.). Duplicates were checked and removed. The  
328 quality assessment of each individual record included in the final geostatistical analysis was performed  
329 by two independent reviewers, based on a quality evaluation list (appendix pp 23-40).

330 We extracted data following the GATHER checklist (appendix pp 41-42) (*Stevens, et al.,2016*). Detailed  
331 information of records were extracted into a database, which includes literature information (eg, journal,  
332 authors, publication date, title, volume, and issue), survey information (eg, survey type: community- or  
333 school-based, year of survey), location information (eg, location name, location type, coordinates), and  
334 disease related data (eg, species of parasites, diagnostic method, population age, number of examined,  
335 number of positive, and percentage of positive). The coordinates of the survey locations were obtained  
336 from Google Maps (<https://www.google.com/maps/>). Considering that areas are much smaller of ADM2  
337 or ADM3, compared to that of ADM1, we treated surveys aggregated in ADM2 or ADM3 as point-level  
338 georeferenced at division centroids referring to previous studies (*Lai, et al.,2019*), while surveys  
339 aggregated over ADM1 as area-level, in order to avoid large uncertainty in the later geostatistical analysis.

340 Missing data imputation was undertaken: (1) for surveys that only reported prevalence without numbers  
341 of examined, a sample size of 50 was assigned to point-referenced surveys, while a sample size of 500  
342 was assigned to area-level surveys; (2) for surveys reported prevalence in intervals without exact  
343 observed values, the medians of the intervals were assigned.

#### 344 **Environmental, socioeconomic, and demographic data**

345 The environmental data (ie, annual precipitation, distance to the nearest open water bodies, elevation,  
346 land cover, land surface temperature in the daytime and at night and normalized difference vegetation

347 index), socioeconomic data (ie, human influence index, survey type, and travel time to the nearest big  
348 city), and demographic data of Southeast Asia were downloaded from open data sources (appendix p 6).  
349 All data were aligned over a 5×5 km grid across the Southeast Asia region using the “raster” package  
350 (<https://cran.r-project.org/web/packages/raster>) in R (version 3.5.0). Data at point-referenced survey  
351 locations were extracted using the same package. We linked the data to the divisions (ie, ADM1, ADM2  
352 or ADM3) reported aggregated outcome of interest (ie, infection prevalence) by averaging them within  
353 the corresponding divisions. Details of data processing are available in the appendix (p 7).

### 354 **Statistical analysis**

355 As our outcome of interest derived from both point-referenced and area-aggregated surveys, a Bayesian  
356 geostatistical joint modeling approach was applied to analyze the area-level and point-level survey data  
357 together (*Moraga, et al.,2017; Utazi, et al.,2019*).

358 A latent spatial-temporal process following a zero-mean Gaussian distribution was introduced to model  
359 the covariance of data residuals in space and time. The survey years were grouped into four periods:  
360 before 1990, 1990-1999, 2000-2009, and from 2010 onwards and  $t = 1, 2, 3, 4$  were set to represent  
361 the corresponding periods, respectively. We defined  $p_{it}$  the probability of infection at location  $i$  and  
362 time period  $t$ , where  $i$  is the index either for the location of point-referenced data or of the area for  
363 area-level data. Let  $Y_{it}$  and  $N_{it}$  be the number of positive and the number of examined individuals,  
364 respectively, at location  $i$  and time period  $t$ . We assumed that  $Y_{it}$  follows a binomial distribution, that  
365 is,  $Y_{it} \sim \text{Bin}(p_{it}, N_{it})$ , where  $i = 1, \dots, n_A, n_A + 1, \dots, n_A + n_p$ ,  $n_A$  the total number of areas for area-  
366 level surveys and  $n_p$  the total number of locations for point-referenced surveys. We modelled predictors  
367 on a logit scale of  $p_{it}$ . A standard grid of 5×5 km was overlaid to each survey area resulting in a certain  
368 number of pixels representing the area. We assumed that survey locations and pixels within survey areas  
369 shared the same spatial-temporal process. Regarding to area-level data,  $\text{logit}(p_{it}) = \widetilde{\mathbf{x}}_{it}'\boldsymbol{\beta} +$   
370  $|A_i|^{-1} \int_{A_i} \omega(s, t) ds dt$ , where  $i = 1, \dots, n_A$ ,  $\widetilde{\mathbf{x}}_{it}$  the vectors of covariate values for  $i^{th}$  area in time  
371 period  $t$  with  $\widetilde{\mathbf{x}}_{it}' = |A_i|^{-1} \int_{A_i} \omega(s, t) ds dt$  and  $\boldsymbol{\beta}$  are the corresponding regression coefficients.  
372  $|A_i| = \int_{A_i} 1 ds$  is the size of the  $i$ th area and  $\omega(s, t)$  the spatial-temporal random effects of pixels  
373 within the area. For point-referenced data,  $\text{logit}(p_{it}) = \mathbf{x}'_{it}\boldsymbol{\beta} + \omega(s_i, t)$ , where  $i = n_A + 1, \dots, n_A + n_p$ ,  
374  $\mathbf{x}'_{it}$  the vectors of covariate values and  $\omega(s_i, t)$  the spatial-temporal random effect for  $i^{th}$  location in

375 time period  $t$ . We assumed the spatio-temporal random effect  $\omega(s, t)$  follow a zero-mean Gaussian  
376 distribution, that is  $\omega \sim GP(0, \mathbf{K}_{space} \otimes \mathbf{K}_{time})$ , where the spatial covariance matrix  $\mathbf{K}_{space}$  was  
377 defined as a stationary Matérn covariance function  $\sigma_{\phi}^2(\kappa \mathbf{D})^{\nu} K_{\nu}(\kappa \mathbf{D}) / (\Gamma(\nu) 2^{\nu-1})$  and the temporal  
378 covariance matrix as  $\mathbf{K}_{time} = \rho^{|t_u - t_o|}$  with  $|\rho| < 1$ , corresponding to the autoregressive stochastic  
379 process with first order (AR1). Here  $\mathbf{D}$  donates the Euclidean distance matrix,  $\kappa$  is a scaling parameter  
380 and the range  $r = \sqrt{8\nu}/\kappa$ , representing the distance at which spatial correlation becomes negligible  
381 ( $< 0.1$ ), and  $K_{\nu}$  is the modified Bessel function of the second kind, with the smoothness parameter  $\nu$   
382 fixed at 1. We formulated the model in a Bayesian framework. Minimally informative priors were  
383 specified for parameters and hyper parameters as following:  $\boldsymbol{\beta} \sim N(0, 10^5 \mathbf{I})$ ,  $\log(1/$   
384  $\sigma_{\phi}^2) \sim \text{logGamma}(1, 0.01)$ ,  $\log((1 + \rho)/(1 - \rho)) \sim N(0, 0.15)$ , and  $\log(\kappa) \sim N(\log(\sqrt{8}/m), 1)$ , where  
385  $m$  is the median distance between the predicted grids.

386 Additionally, we used the best subset variable selection method to find out the best combination of  
387 predictors for the final model (*Karagiannis-Voules, et al., 2015*). According to previous studies (*Aung,*  
388 *et al., 2017*; *Forrer, et al., 2012*; *Miyamoto, et al., 2014*; *Wongsaroj, et al., 2014*), the infection risk in  
389 community and school may be different, thus the survey type (ie, community- or school-based) was kept  
390 in all potential models, while the other ten environmental and socioeconomic variables mentioned above  
391 were put forth into the Bayesian variable selection process. The model with a minimum log score was  
392 chosen as the final model.

393 Model fitting and variable selection process were conducted through INLA-SPDE approach (*Lindgren,*  
394 *et al., 2011*; *Rue, et al., 2009*), using integrated nested Laplace approximation (INLA) package in R  
395 (version 3.5.0). Estimation of risk for *O. viverrini* infection during each time period was done over a grid  
396 with cell size of 5×5 km. The corresponding risk maps were produced using ArcGIS (version 10.2). In  
397 addition, the population-adjusted estimated prevalence and number of infected individuals in 2018 were  
398 calculated at the country- and provincial levels based on pixel-level estimates and gridded demographic  
399 information. Based on previous studies, for the provinces in Vietnam where there was no evidence of *O.*  
400 *viverrini* infection, we multiplied the estimated results by zero as the final estimated prevalence (*Doanh*  
401 *and Nawa, 2016*). Model validation was conducted using the five-fold out-of-sample cross-validation  
402 approach. The predictive accuracy was assessed under the receiver-operating characteristic (ROC) curve  
403 by calculating the area under the curve (AUC) (*Brooker, et al., 2001*). Correlation coefficient between

404 observed and estimated prevalence values was calculated (appendix p 10). Furthermore, a Bayesian  
405 geostatistical model only based on point-referenced data was fit and validated, to compared its  
406 performance with our joint modeling approach. Considering that the data in this study were sourced from  
407 different studies, a test for detecting preferential sampling of spatial-temporal processes is implemented  
408 (appendix p 11) (*Watson,2020*). In addition, a sensitivity analysis was conducted to evaluate the effects  
409 of imputation on missing data (appendix pp 18-22).

410

## 411 **Additional information**

### 412 **Funding**

| <b>Funder</b>                                        | <b>Grant reference number</b> | <b>Author</b> |
|------------------------------------------------------|-------------------------------|---------------|
| The Sun Yat-Sen University One Hundred Talent Grant  | -                             | Ying-Si Lai   |
| The Natural Science Foundation of Guangdong Province | 2017A030313704                | Ying-Si Lai   |
| The National Natural Science Foundation of China     | 81703320                      | Ying-Si Lai   |
| The CMB Open Competition Program                     | 17-274                        | Ying-Si Lai   |

The funders had no role in study design, data collection and interpretation, or the decision to submit the work for publication.

### 413 **Author contributions**

414 TTZ, HYT, and YSL made substantial contributions to the study concept and design. TTZ, YJF, and PND  
415 made substantial contributions to data collection. TTZ and YSL made substantial contributions to data  
416 analysis, and interpretation. TTZ and YSL were in charge of the manuscript draft. PND, SS, VK, CN,  
417 MBQ, YTH, and YSL made substantial revisions to the manuscript.

### 418 **Acknowledgments**

419 We are grateful to Dr Roy Burstein from Institute for Disease Modeling, Bellevue, Washington, USA for  
420 providing very good suggestions for the manuscript.

### 421 **Competing interests**

422 The authors declare that no competing interests exist.

## 423 **References**

- 424 Andrews RH, Sithithaworn P, Petney TN. 2008. *Opisthorchis viverrini*: an underestimated parasite in  
425 world health. *Trends in Parasitology* **24**:497-501. doi:10.1016/j.pt.2008.08.011
- 426 Aung WPP, Htoon TT, Tin HH, Thinn KK, Sanpool O, Jongthawin J, Sadaow L, Phosuk I, Rodpai R,  
427 Intapan PM, Maleewong W. 2017. First report and molecular identification of *Opisthorchis viverrini*  
428 infection in human communities from Lower Myanmar. *PLOS ONE* **12**:e177130.  
429 doi:10.1371/journal.pone.0177130
- 430 Baker M, Hanson C, Ottesen EA, Linehan M, Torres S, Sankara D, Zoerhoff KL, Weaver A, Kabore A.  
431 2011. Integrated Implementation of Programs Targeting Neglected Tropical Diseases through Preventive  
432 Chemotherapy: Proving the Feasibility at National Scale. *The American Journal of Tropical Medicine*  
433 *and Hygiene* **84**:5-14. doi:10.4269/ajtmh.2011.10-0411
- 434 Banerjee S, Carlin BP, Gelfand AE. 2014. Hierarchical Modeling and Analysis for Spatial Data, Second  
435 Edition. Boca Raton, FL: Chapman & Hall/CRC Press.
- 436 Brooker S, Hay SI, Issae W, Hall A, Kihamia CM, Lwambo NJS, Wint W, Rogers DJ, Bundy DAP.  
437 2001. Predicting the distribution of urinary schistosomiasis in Tanzania using satellite sensor data.  
438 *Tropical Medicine & International Health* **6**:998-1007. doi:10.1046/j.1365-3156.2001.00798.x
- 439 Chai J, Yong T, Eom KS, Min D, Jeon H, Kim T, Jung B, Sisabath L, Insisiengmay B, Phommasack B,  
440 Rim H. 2013. Hyperendemicity of *Haplorchis taichui* Infection among Riparian People in Saravane and  
441 Champasak Province, Lao PDR. *The Korean Journal of Parasitology* **51**:305-311.  
442 doi:10.3347/kjp.2013.51.3.305
- 443 Chai J, Yong T, Eom KS, Min D, Shin E, Banouvong V, Insisiengmay B, Insisiengmay S, Phommasack  
444 B, Rim H. 2010. Prevalence of the Intestinal Flukes *Haplorchis taichui* and *H. yokogawai* in a  
445 Mountainous Area of Phongsaly Province, Lao PDR. *The Korean Journal of Parasitology* **48**:339-342.  
446 doi:10.3347/kjp.2010.48.4.339
- 447 Charoensuk L, Subrungruang I, Mungthin M, Pinlaor S, Suwannahitatorn P. 2019. Comparison of stool  
448 examination techniques to detect *Opisthorchis viverrini* in low intensity infection. *Acta Tropica* **191**:13-  
449 16. doi:10.1016/j.actatropica.2018.12.018
- 450 Doanh PN, Nawa Y. 2016. *Clonorchis sinensis* and *Opisthorchis spp.* in Vietnam: current status and  
451 prospects. *Transactions of the Royal Society of Tropical Medicine and Hygiene* **110**:13-20.  
452 doi:10.1093/trstmh/trv103
- 453 Dunn JC, Turner HC, Tun A, Anderson RM. 2016. Epidemiological surveys of, and research on, soil-  
454 transmitted helminths in Southeast Asia: a systematic review. *Parasites & Vectors* **9**:31.  
455 doi:10.1186/s13071-016-1310-2
- 456 Echaubard P, Sripa B, Mallory FF, Wilcox BA. 2016. The role of evolutionary biology in research and  
457 control of liver flukes in Southeast Asia. *Infection, Genetics and Evolution* **43**:381-397.  
458 doi:10.1016/j.meegid.2016.05.019
- 459 Elith J, Phillips SJ, Hastie T, Dudík M, Chee YE, Yates CJ. 2011. A statistical explanation of MaxEnt  
460 for ecologists. *Diversity and Distributions* **17**:43-57. doi:10.1111/j.1472-4642.2010.00725.x

- 461 Forrer A, Sayasone S, Vounatsou P, Vonghachack Y, Bouakhasith D, Vogt S, Glaser R, Utzinger J,  
462 Akkhavong K, Odermatt P. 2012. Spatial distribution of, and risk factors for, *Opisthorchis viverrini*  
463 infection in southern Lao PDR. *PLOS Neglected Tropical Diseases* **6**:e1481.  
464 doi:10.1371/journal.pntd.0001481
- 465 Fürst T, Keiser J, Utzinger J. 2012. Global burden of human food-borne trematodiasis: a systematic  
466 review and meta-analysis. *The Lancet Infectious Diseases* **12**:210-221. doi:10.1016/S1473-  
467 3099(11)70294-8
- 468 Gelfand AE, Banerjee S. 2017. Bayesian Modeling and Analysis of Geostatistical Data. *Annual Review*  
469 *of Statistics and Its Application* **4**:245-266. doi:10.1146/annurev-statistics-060116-054155
- 470 Gordon C, Kurscheid J, Williams G, Clements A, Li Y, Zhou X, Utzinger J, McManus D, Gray D. 2019.  
471 Asian Schistosomiasis: Current Status and Prospects for Control Leading to Elimination. *Tropical*  
472 *Medicine and Infectious Disease* **4**:40. doi:10.3390/tropicalmed4010040
- 473 Grundy-Warr C, Andrews RH, Sithithaworn P, Petney TN, Sripa B, Laithavewat L, Ziegler AD. 2012.  
474 Raw attitudes, wetland cultures, life-cycles: Socio-cultural dynamics relating to *Opisthorchis viverrini*  
475 in the Mekong Basin. *Parasitology International* **61**:65-70. doi:10.1016/j.parint.2011.06.015
- 476 Havelaar AH, Kirk MD, Torgerson PR, Gibb HJ, Hald T, Lake RJ, Praet N, Bellinger DC, de Silva NR,  
477 Gargouri N, Speybroeck N, Cawthorne A, Mathers C, Stein C, Angulo FJ, Devleeschauwer B. 2015.  
478 World Health Organization Global Estimates and Regional Comparisons of the Burden of Foodborne  
479 Disease in 2010. *PLOS Medicine* **12**:e1001923. doi:10.1371/journal.pmed.1001923
- 480 International Agency for Research on Cancer. 1994. Schistosomes, liver flukes and *Helicobacter pylori*.  
481 *IARC Monographs on the Evaluation of Carcinogenic Risks to Humans* **61**:1-241.
- 482 Jongsuksuntigul P, Imsomboon T. 2003. Opisthorchiasis control in Thailand. *Acta Tropica* **88**:229-232.  
483 doi:<https://doi.org/10.1016/j.actatropica.2003.01.002>
- 484 Jongsuksuntigul P, Manatrakul D, T TW, Krisanamara P, Sawatdimongkol S, Wongsaroj S. 2003.  
485 Evaluation of the Helminthiasis Control Program in Thailand at the End of the 8th Health Development  
486 Plan. *The Journal of Tropical Medicine and Parasitology* **26**:18-45.
- 487 Kaewpitoon N, Kaewpitoon SJ, Pengsaa P. 2008. Opisthorchiasis in Thailand: review and current status.  
488 *World Journal of Gastroenterology* **14**:2297-2302.
- 489 Karagiannis-Voules D, Biedermann P, Ekpo UF, Garba A, Langer E, Mathieu E, Midzi N, Mwinzi P,  
490 Polderman AM, Raso G, Sacko M, Talla I, Tchuenté LT, Touré S, Winkler MS, Utzinger J, Vounatsou  
491 P. 2015. Spatial and temporal distribution of soil-transmitted helminth infection in sub-Saharan Africa:  
492 a systematic review and geostatistical meta-analysis. *The Lancet Infectious Diseases* **15**:74-84.  
493 doi:[https://doi.org/10.1016/S1473-3099\(14\)71004-7](https://doi.org/10.1016/S1473-3099(14)71004-7)
- 494 Keiser J, Utzinger J. 2010. The Drugs We Have and the Drugs We Need Against Major Helminth  
495 Infections. *Advances in Parasitology* **73**:197-230. doi:[https://doi.org/10.1016/S0065-308X\(10\)73008-6](https://doi.org/10.1016/S0065-308X(10)73008-6)
- 496 Keiser J, Utzinger J. 2005. Emerging Foodborne Trematodiasis. *Emerging Infectious Diseases* **11**:1507-  
497 1514. doi:10.3201/eid1110.050614
- 498 Keiser, Jennifer. 2019. Highlighting Operational and Implementation Research for Control of  
499 Helminthiasis. GB: Academic Press.

- 500 Khieu V, Furst T, Miyamoto K, Yong TS, Chai JY, Huy R, Muth S, Odermatt P. 2019. Is *Opisthorchis*  
501 *viverrini* Emerging in Cambodia? *Advances in Parasitology* **103**:31-73. doi:10.1016/bs.apar.2019.02.002
- 502 Lai Y, Biedermann P, Shrestha A, Chammartin F, À Porta N, Montresor A, Mistry NF, Utzinger J,  
503 Vounatsou P. 2019. Risk profiling of soil-transmitted helminth infection and estimated number of  
504 infected people in South Asia: A systematic review and Bayesian geostatistical Analysis. *PLOS*  
505 *Neglected Tropical Diseases* **13**:e7580. doi:10.1371/journal.pntd.0007580
- 506 Laoprom N, Laithavewat L, Kopolrat K, Kiatsopit N, Kaewkes S, Chantalux S, Mongkolsin C,  
507 Chanmaha B, Andrews RH, Petney TN, Sithithaworn P. 2016. Evaluation of a commercial stool  
508 concentrator kit compared to direct smear and formalin-ethyl acetate concentration methods for diagnosis  
509 of parasitic infection with special reference to *Opisthorchis viverrini* sensu lato in Thailand. *Southeast*  
510 *Asian Journal of Tropical Medicine and Public Health* **47**:890-900.
- 511 Lindgren F, Rue H, Lindström J, Kent JT, Diggle PJ, Illian JB, Simpson DP, Gneiting T, Scheuerer M,  
512 Furrer R, Furrer E, Nychka D, Fearnhead P, Challenor P, Andrianakis Y, Stephenson G, Møller J, Hu X,  
513 Simpson D, Bolin D, Brown PE, Cameletti M, Martino S, Cooley D, Hoeting JA, Crujeiras RM, Prieto  
514 A, Marco ARF, Fuglstad G, Gelman A, Guttorp P, Das B, Haaland B, Nott DJ, Haslett J, Joshi C, Garreta  
515 V, Höhle M, Ippoliti L, Martin RJ, Bhansali RJ, Jandhyala VK, Fotopoulos SB, Jun M, Kongsgård HW,  
516 Lasinio GJ, Pollice A, Lee C, Lee WT, Kaufman CG, Li B, Genton MG, Lindgren G, Mardia KV, Mateu  
517 J, Mondal D, Müller WG, Waldl H, Ottavi A, Papaspiliopoulos O, Porcu E, Saez M, Schmidt AM, Stein  
518 A, Switzer P, Turkman K, Wikle CK, Hooten MB. 2011. An explicit link between Gaussian fields and  
519 Gaussian Markov random fields: the stochastic partial differential equation approach. *Journal of the*  
520 *Royal Statistical Society: Series B (Statistical Methodology)* **73**:423-498. doi:10.1111/j.1467-  
521 9868.2011.00777.x
- 522 Lovis L, Mak TK, Phongluxa K, Soukhathammavong P, Sayasone S, Akkhavong K, Odermatt P, Keiser  
523 J, Felger I. 2009. PCR Diagnosis of *Opisthorchis viverrini* and *Haplorchis taichui* Infections in a Lao  
524 Community in an Area of Endemicity and Comparison of Diagnostic Methods for Parasitological Field  
525 Surveys. *Journal of Clinical Microbiology* **47**:1517-1523. doi:10.1128/JCM.02011-08
- 526 Lu Y, Gonzales G, Chen S, Li H, Cai Y, Chu Y, Ai L, Chen M, Chen H, Chen J. 2017. Urgent needs in  
527 fostering neglected tropical diseases (NTDs) laboratory capacity in WHO Western Pacific Region:  
528 results from the external quality assessment on NTDs diagnosis in 2012-2015. *Infectious Diseases of*  
529 *Poverty* **6**:106-108. doi:10.1186/s40249-017-0319-x
- 530 Maipanich W, Waikagul J, Watthanakulpanich D, Muennoo C, Sanguankiat S. 2004. Intestinal Parasitic  
531 Infections among Inhabitants of the North, West-central and Eastern Border Areas of Thailand. *The*  
532 *Journal of Tropical Medicine and Parasitology* **27**:51-58.
- 533 McCreesh N, Booth M. 2013. Challenges in predicting the effects of climate change on *Schistosoma*  
534 *mansoni* and *Schistosoma haematobium* transmission potential. *Trends in Parasitology* **29**:548-555.  
535 doi:<https://doi.org/10.1016/j.pt.2013.08.007>
- 536 Miyamoto K, Kirinoki M, Matsuda H, Hayashi N, Chigusa Y, Sinuon M, Chuor CM, Kitikoon V. 2014.  
537 Field survey focused on *Opisthorchis viverrini* infection in five provinces of Cambodia. *Parasitology*  
538 *International* **63**:366-373. doi:10.1016/j.parint.2013.12.003
- 539 Moher D, Liberati A, Tetzlaff J, Altman DG. 2010. Preferred reporting items for systematic reviews and

- 540 meta-analyses: The PRISMA statement. *International Journal of Surgery* **8**:336-341.  
541 doi:10.1016/j.ijso.2010.02.007
- 542 MOPH. 2014. National Survey on Helminthiasis in Thailand. Department of Disease Control, Ministry  
543 of Public Health, Bangkok, Thailand
- 544 Moraga P, Cramb SM, Mengersen KL, Pagano M. 2017. A geostatistical model for combined analysis  
545 of point-level and area-level data using INLA and SPDE. *Spatial Statistics* **21**:27-41.  
546 doi:10.1016/j.spasta.2017.04.006
- 547 Ogorodova LM, Fedorova OS, Sripa B, Mordvinov VA, Katokhin AV, Keiser J, Odermatt P, Brindley  
548 PJ, Mayboroda OA, Velavan TP, Freidin MB, Sazonov AE, Saltykova IV, Pakharukova MY, Kovshirina  
549 YV, Kaloulis K, Krylova OY, Yazdanbakhsh M. 2015. Opisthorchiasis: An Overlooked Danger. *PLOS*  
550 *Neglected Tropical Diseases* **9**:e3563. doi:10.1371/journal.pntd.0003563
- 551 Petney TN, Andrews RH, Saijuntha W, Wenz-Mücke A, Sithithaworn P. 2013. The zoonotic, fish-borne  
552 liver flukes *Clonorchis sinensis*, *Opisthorchis felinus* and *Opisthorchis viverrini*. *International Journal*  
553 *for Parasitology* **43**:1031-1046. doi:10.1016/j.ijpara.2013.07.007
- 554 Phimpraphai W, Tangkawattana S, Kasemsuwan S, Sripa B. 2018. Social Influence in Liver Fluke  
555 Transmission: Application of Social Network Analysis of Food Sharing in Thai Isaan Culture. *Advances*  
556 *in Parasitology* **101**:97-124. doi:10.1016/bs.apar.2018.05.004
- 557 Phimpraphai W, Tangkawattana S, Sereerak P, Kasemsuwan S, Sripa B. 2017. Social network analysis  
558 of food sharing among households in opisthorchiasis endemic villages of Lawa Lake, Thailand. *Acta*  
559 *Tropica* **169**:150-156. doi:10.1016/j.actatropica.2017.02.001
- 560 Prueksapanich P, Piyachaturawat P, Aumpansub P, Ridditid W, Chaiteerakij R, Rerknimitr R. 2018. Liver  
561 Fluke-Associated Biliary Tract Cancer. *Gut and Liver* **12**:236-245. doi:10.5009/gnl17102
- 562 Qian M, Zhou X. 2019. Human liver flukes in China and ASEAN: Time to fight together. *PLOS*  
563 *Neglected Tropical Diseases* **13**:e7214. doi:10.1371/journal.pntd.0007214
- 564 Rue H, Martino S, Chopin N. 2009. Approximate Bayesian inference for latent Gaussian models by using  
565 integrated nested Laplace approximations. *Journal of the Royal Statistical Society: Series B (Statistical*  
566 *Methodology)* **71**:319-392. doi:10.1111/j.1467-9868.2008.00700.x
- 567 Saijuntha W, Sithithaworn P, Kaitsopit N, Andrews RH, Petney TN. 2014. Liver flukes: Clonorchis and  
568 Opisthorchis. *Advances in Experimental Medicine and Biology* **766**:153-199. doi:10.1007/978-1-4939-  
569 0915-5\_6
- 570 Sanderson EW, Jaiteh M, Levy MA, Redford KH, Woolmer G. 2002. The Human Footprint and the Last  
571 of the Wild. *BioScience* **52**:891-904.
- 572 Sato M, Pongvongsa T, Sanguankiat S, Yoonuan T, Dekumyoy P, Kalambaheti T, Keomoungkhoun M,  
573 Phimmayoi I, Boupha B, Moji K, Waikagul J. 2010. Copro-DNA diagnosis of *Opisthorchis viverrini* and  
574 *Haplorchis taichui* infection in an endemic area of Lao PDR. *The Southeast Asian Journal of Tropical*  
575 *Medicine and Public Health* **41**:28.
- 576 Sayasone S, Utzinger J, Akkhavong K, Odermatt P. 2015. Repeated stool sampling and use of multiple  
577 techniques enhance the sensitivity of helminth diagnosis: A cross-sectional survey in southern Lao



- 578 People's Democratic Republic. *Acta Tropica* **141**:315-321. doi:10.1016/j.actatropica.2014.09.004
- 579 Sithithaworn P, Andrews RH, Van De N, Wongsaroj T, Sinuon M, Odermatt P, Nawa Y, Liang S,  
580 Brindley PJ, Sripa B. 2012. The current status of opisthorchiasis and clonorchiasis in the Mekong Basin.  
581 *Parasitology International* **61**:10-16. doi:10.1016/j.parint.2011.08.014
- 582 Smith BJ, Yan J, Cowles MK. 2008. Unified Geostatistical Modeling for Data Fusion and Spatial  
583 Heteroskedasticity with R Package ramps. *Journal of Statistical Software* **25**. doi:10.18637/jss.v025.i10
- 584 Sohn W. 2011. Adult *Opisthorchis viverrini* Flukes in Humans, Takeo, Cambodia. *Emerging Infectious  
585 Diseases* **17**:1302-1304. doi:10.3201/eid1707.102071
- 586 Sohn W, Jung B, Hong S, Lee K, Park J, Kim H, Cho S, Htoon TT, Tin HH, Chai J. 2019. Low-Grade  
587 Endemicity of Opisthorchiasis, Yangon, Myanmar. *Emerging Infectious Diseases* **25**:1435-1437.  
588 doi:10.3201/eid2507.190495
- 589 Sripa B, Kaewkes S, Intapan PM, Maleewong W, Brindley PJ. 2010. Food-Borne Trematodiasis in  
590 Southeast Asia: Epidemiology, Pathology, Clinical Manifestation and Control. *Advances in Parasitology*  
591 **72**:305-350. doi:10.1016/S0065-308X(10)72011-X
- 592 Sripa B, Tangkawattana S, Laha T, Kaewkes S, Mallory FF, Smith JF, Wilcox BA. 2015. Toward  
593 integrated opisthorchiasis control in northeast Thailand: The Lawa project. *Acta Tropica* **141**:361-367.  
594 doi:10.1016/j.actatropica.2014.07.017
- 595 Stevens GA, Alkema L, Black RE, Boerma JT, Collins GS, Ezzati M, Grove JT, Hogan DR, Hogan MC,  
596 Horton R, Lawn JE, Marušić A, Mathers CD, Murray CJL, Rudan I, Salomon JA, Simpson PJ, Vos T,  
597 Welch V. 2016. Guidelines for Accurate and Transparent Health Estimates Reporting: the GATHER  
598 statement. *PLOS Medicine* **13**:e1002116. doi:10.1371/journal.pmed.1002056
- 599 Suwannatrai A, Pratumchart K, Suwannatrai K, Thinkhamrop K, Chaiyos J, Kim CS,  
600 Suwanweerakamtorn R, Boonmars T, Wongsaroj T, Sripa B. 2017. Modeling impacts of climate change  
601 on the potential distribution of the carcinogenic liver fluke, *Opisthorchis viverrini*, in Thailand.  
602 *Parasitology Research* **116**:243-250. doi:10.1007/s00436-016-5285-x
- 603 Suwannatrai A, Saichua P, Haswell M. 2018. Epidemiology of *Opisthorchis viverrini* Infection.  
604 *Advances in Parasitology* **101**:41-67. doi:10.1016/bs.apar.2018.05.002
- 605 UN. 2015. Transforming our world: the 2030 Agenda for Sustainable Development. United Nations, New  
606 York, NY, USA
- 607 Utazi CE, Thorley J, Alegana VA, Ferrari MJ, Nilsen K, Takahashi S, Metcalf C, Lessler J, Tatem AJ.  
608 2019. A spatial regression model for the disaggregation of areal unit based data to high-resolution grids  
609 with application to vaccination coverage mapping. *Statistical Methods in Medical Research* **28**:3226-  
610 3241. doi:10.1177/0962280218797362
- 611 Van De N. 2004. Fish-borne trematodes in Vietnam. *Southeast Asian Journal of Tropical Medi  
612 cine and Public Health* **35**:299-301. URL: <https://pdfs.semanticscholar.org/4952/fe365526c6cf9bb2e81571d151450d18ef0f.pdf>  
613
- 614 Watson J. 2020. A fast Monte Carlo test for preferential sampling. Cornell University.  
615 URL:<https://arxiv.org/abs/2003.01319v2> [Preprint]

- 616 WHO. 2012. Accelerating work to overcome the global impact of neglected tropical diseases. World  
617 Health Organization, Geneva
- 618 WHO. 2002. Joint WHO/FAO Workshop on Foodborne Trematode Infections in Asia. World Health  
619 Organization, Geneva
- 620 WHO. 2009. Report of the WHO Expert Consultation on Foodborne Trematode Infections and  
621 Taeniasis/Cysticercosis. World Health Organization, Geneva
- 622 Wijit A, Morakote N, Klinchid J. 2013. High Prevalence of Haplorchiasis in Nan and Lampang Provinces,  
623 Thailand, Proven by Adult Worm Recovery from Suspected Opisthorchiasis Cases. *The Korean Journal*  
624 *of Parasitology* **51**:767-769. doi:10.3347/kjp.2013.51.6.767
- 625 Wongsaroj T, Nithikathkul C, Rojkitikul W, Nakai W, Royal L, Rammasut P. 2014. National survey of  
626 helminthiasis in Thailand. *Asian Biomedicine* **8**:779-783. doi:10.5372/1905-7415.0806.357
- 627 Yong T, Chai J, Sohn W, Eom KS, Jeoung H, Hoang E, Yoon C, Jung B, Lee S, Sinuon M, Socheat D.  
628 2014. Prevalence of Intestinal Helminths among Inhabitants of Cambodia (2006-2011). *The Korean*  
629 *Journal of Parasitology* **52**:661-666. doi:10.3347/kjp.2014.52.6.661
- 630 Ziegler AD, Andrews RH, Grundy-Warr C, Sithithaworn P, Petney TN. 2011. Fighting Liverflukes with  
631 Food Safety Education. *Science* **331**:282-283. doi:10.1126/science.331.6015.282-b
- 632
